1 **Differential effects of socio-demographic factors on maternal haemoglobin**  
2 **concentration in three sub-Saharan African Countries**

3

4 Dickson A. Amugsi<sup>1\*</sup>

5 [damugsi2002@yahoo.com](mailto:damugsi2002@yahoo.com); [damugsi@aphrc.org](mailto:damugsi@aphrc.org)

6 Zacharie T. Dimbuene<sup>2, 3</sup>

7 [zacharie.tsala.dimbuene@gmail.com](mailto:zacharie.tsala.dimbuene@gmail.com)

8 Catherine Kyobutungi<sup>1</sup>

9 [ckyobutungi@aphrc.org](mailto:ckyobutungi@aphrc.org)

10

11 1. Maternal and Child Wellbeing Unit, African Population and Health Research Center,  
12 APHRC Campus, P.O Box 10787-00100, Nairobi, Kenya

13 2. Department of Population Sciences and Development, University of Kinshasa,  
14 Democratic Republic of the Congo

15 3. Social Analysis and Modeling Division, Statistics Canada, Ottawa, Canada K1A 0T6

16

17 \* Corresponding author: Dr Dickson A. Amugsi

18 Email: [damugsi2002@yahoo.com](mailto:damugsi2002@yahoo.com); [damugsi@aphrc.org](mailto:damugsi@aphrc.org)

19

20 Word count: 3832

21

22

23

24

25

26

27

28

29

30 **Abstract**

31 **Objective:** To investigate the effects of socio-demographic factors on maternal  
32 haemoglobin (Hb) at different points of the conditional distribution of Hb concentration.

33 **Methods:** We analysed the Demographic and Health Surveys data from Ghana,  
34 Democratic Republic of the Congo (DRC) and Mozambique, using Hb concentration of  
35 women aged 15-49 years as an outcome of interest. We utilise quantile regression to  
36 estimate the effects of the putative socio-demographic factors across specific points of  
37 the maternal Hb concentration.

38 **Results:** We observed crucial differences in the effects of socio-demographic factors  
39 along the conditional distribution of Hb concentration. In Ghana, years of schooling had  
40 a positive effect on Hb concentration of mothers in the 5<sup>th</sup> and 10<sup>th</sup> quantiles. A year  
41 increase in schooling was associated with a unit increase in Hb concentration across  
42 all quantiles in Mozambique, with the largest effect at the lowest quantile. In contrast, a  
43 year increase in maternal education was associated with a unit decrease in Hb  
44 concentration of mothers in the three upper quantiles in DRC. Maternal body mass  
45 index had a positive effect on Hb of mothers in the 5<sup>th</sup>, 10<sup>th</sup>, 50<sup>th</sup> and 90<sup>th</sup>, and 5<sup>th</sup> to 50<sup>th</sup>  
46 quantiles in Ghana and Mozambique, respectively. Breastfeeding had a significant  
47 positive effect on maternal Hb concentration across all countries, with the largest effect  
48 occurring at the lower quantiles. All the household wealth indices had positive effects on  
49 Hb concentration across quantiles in Mozambique, with the largest effect among  
50 mothers in the upper quantiles. However, in Ghana, living in a poor wealth index was  
51 inversely related to Hb concentration of mothers in the 5<sup>th</sup> and 10<sup>th</sup> quantiles.

52 **Conclusions:** Our results showed that the effects of socio-demographic factors on  
53 maternal Hb concentration vary along its distribution. Interventions to address maternal  
54 anaemia should take these variations into account to identify the most vulnerable  
55 groups.

56

57 **Keywords:** Haemoglobin concentration, socio-demographics, Africa, quantile  
58 regression

59

60

61 **What is already known?**

- 62 • Higher years of formal education consistently predict positive maternal Hb  
63 outcomes in OLS and logistic regression analysis.
- 64 • Low maternal BMI, parity, living in poorest wealth quintile and breastfeeding are  
65 inversely related to maternal Hb concentration.
- 66 • Evidence from logistic regression analysis suggests that mothers who live in  
67 better-off households tend to have a better Hb concentration.

68 **What are the new findings?**

- 69 • Socio-demographic factors have differential effects on Hb concentration at  
70 different points of its distribution.
- 71 • Interpreting results based on the mean effect (as in OLS) does not provide a  
72 comprehensive picture of the effects of the predictor variables.
- 73 • Breastfeeding has a positive effect on maternal Hb concentration contrary to the  
74 existing literature
- 75 • Contrary to the existing literature, maternal education is negatively associated  
76 with Hb of mothers in the three upper quantiles in DRC.

77 **What do the new findings imply?**

- 78 • Differential effects of socio-demographic factors on Hb concentration may help  
79 identify suitable interventions for groups most in need.
- 80 • The QR analysis suggests the need to look beyond OLS findings when designing  
81 interventions to improve maternal Hb concentration.
- 82 • Promoting breastfeeding among mothers may potentially improve their Hb  
83 concentration.

- 84       • The negative effect of maternal education on Hb in DRC, suggests that  
85       educational interventions to improve health outcomes should be context-specific

86

## 87 **Introduction**

88 Maternal anaemia or low haemoglobin (Hb) concentration, a condition in which the Hb is  
89 lower than normal is a worldwide public health problem [1]. It is caused by deficiencies  
90 in iron, folate, copper, and other vital vitamins [2, 3]. Also, infectious disease morbidity,  
91 parasitic infections and blood related genetic disorders among others could cause low  
92 Hb concentration [3, 4]. While the causes of low Hb concentration are multifaceted, the  
93 evidence show that an estimated 50% of low Hb concentration cases reported  
94 worldwide are due to iron deficiency [5-7]. The available data suggest that anaemia  
95 affects about 500 million women of reproductive age, globally [8, 9]. The World Health  
96 Organisation (WHO) estimates indicate that the global anaemia prevalence >30% [2, 6].  
97 Consequently, the WHO included a target of reducing anaemia among women of  
98 reproductive age by 50% by 2025 in its Global Nutrition Targets (GNT) [5]. Similarly,  
99 anaemia was recently added as an indicator to track the progress of sub-goal 2.2 of the  
100 Sustainable Development Goals (SDGs) to end all forms of malnutrition by 2030 [10]. It  
101 is significant to note that the problem of maternal low Hb concentration is particularly  
102 severe in sub-Saharan Africa (SSA) where poverty is highly prevalent and nutritious  
103 food is not easily accessible, coupled with high incidence of infectious diseases [11-13].

104

105 The consequences of low Hb concentration on the health of women include but are not  
106 limited to increased risks of low birth weight, preterm birth, perinatal mortality, and  
107 neonatal mortality [14]. Low Hb concentration also places women at an elevated risk of  
108 death during childbirth and postpartum [15]. Additionally, the literature suggests that  
109 deficient Hb concentration can result in cardiac decompensation (i.e. the failure of the  
110 heart to maintain adequate blood circulation). It also elevates the risk of haemorrhage  
111 and decreases the ability to tolerate blood loss, which can lead to circulatory shock and  
112 death [16, 17]. The consequences of low Hb concentration mentioned above calls for an

113 investigation that would examine the effects of putative factors across the conditional  
114 distribution of the Hb concentration. Such an inquiry will provide entry points for  
115 interventions to address maternal anaemia in developing countries. This study intends  
116 to achieve this goal by using an analytical strategy that focuses on the effects of socio-  
117 demographic factors at different stages of the conditional distribution of maternal Hb  
118 concentration.

119

120 The existing literature has identified several factors that have both negative and positive  
121 effects on maternal Hb concentration. Some of these factors include, maternal age,  
122 education, parity, marital status, household size, socioeconomic status, place of  
123 residence, body mass index (BMI) and breastfeeding [18-25]. A study in Dhaka showed  
124 a strong relationship between maternal age, education level, income level, and maternal  
125 Hb concentration [18]. Moreover, higher BMI, primiparity, and living in better-off  
126 households were associated with higher levels of Hb [21, 22]. On the contrary, low  
127 family income and large family size are negatively associated with maternal Hb  
128 concentration [24]. Further, low maternal BMI, parity, living in poorest wealth quintile  
129 and breastfeeding were inversely related to maternal Hb concentration [25]. Other  
130 studies have shown that being separated or widowed, using an intrauterine device and  
131 place of residence increased the odds of low Hb concentration among women [22, 23].

132

133 Indeed, from the studies reviewed above, it appears the literature on maternal anaemia  
134 is abound. Nonetheless, there are shortfalls with the analytical strategies employed in  
135 these studies. For example, almost all these studies used either Ordinary Least  
136 Squares (OLS) or logistic regression to estimate the effects of socio-demographics on  
137 Hb concentration. This may mask the differential effects that may occur throughout the  
138 entire distribution of the Hb concentration--socio-demographic factors may influence  
139 maternal Hb differently across the distribution of the Hb concentration. The possible  
140 differences in the effects of socio-demographic factors on Hb concentration suggest the

141 need to undertake an analysis that has the potential to present a comprehensive and  
142 complete picture of the effects of these factors on maternal Hb concentration. The  
143 quantile regression analytical strategy utilised in this paper can determine the effects of  
144 the socio-demographic factors at different points of the conditional distribution of  
145 maternal Hb concentration. Therefore, the objective this study was to examine the  
146 effects of sociodemographic factors on maternal Hb concentration using quantile  
147 regression. This type of analysis is currently missing in the anaemia research arena.

148

## 149 **Methods**

### 150 *Data sources and study design*

151 This study involved a secondary analysis of the demographic and health survey (DHS)  
152 data [26] from Ghana, Mozambique, and Democratic Republic of Congo (DRC). These  
153 are nationally representative data collected every five years in low and middle income  
154 countries (LMICs). We based the selection of the three countries on our previous  
155 analysis [27], as well as availability of anaemia data. In designing the surveys, the DHS  
156 ensured that the surveys are identical across all participating countries to facilitate  
157 comparison between and among nations. The DHS utilised a two-stage sample design  
158 in the selection of participating households in their surveys. The detail description of the  
159 DHS design processes is published elsewhere [28-32].

### 160 *Study participants*

161 The study participants were women aged 15-49 years and who had complete anaemia  
162 data. Information on study participants was obtained through a face-to-face interviews.  
163 The DHS collected blood samples for anaemia testing from mothers who voluntarily  
164 consented to be tested [30]. Blood samples were drawn from a drop of blood taken from  
165 a finger prick and collected in a microcuvette. Hb concentration analysis was  
166 undertaken on-site using a battery-operated portable HemoCue analyser. Non-pregnant  
167 women with a Hb concentration less than 7.0 g/dl, and pregnant women with a Hb  
168 concentration lower than 9.0 g/dl were referred to a nearby health facility for immediate

169 treatment [30]. The total samples per each country used in the present analysis were,  
170 Ghana (n= 2975), DRC (n= 9438) and Mozambique (n= 10961).

171

## 172 **Ethical statement**

173 The DHS study was undertaken based on high ethical standards [33]. Data collectors  
174 were trained to recognise and respect the rights of study participants. They also  
175 informed participants of their rights to decide whether to participate in the study or not.  
176 The risks and benefits of the study as well as steps taken to mitigate the potential risks  
177 were adequately explained to study participants. The protocols of the study in each  
178 country, including biomarker collection, were approved by the recognised ethics review  
179 committees of each country, and the Institutional Review Board of ICF International,  
180 USA. Written informed consent was obtained from each study participant before they  
181 were allowed to participate in the study. The biomarker results were made available to  
182 study participants [30]. The DHS Program, USA, granted permission to the authors for  
183 the use of the data. Due to the anonymous nature of the data, the authors did not seek  
184 further ethical clearance.

185

## 186 **Measures**

### 187 *Outcome variable*

188 We used maternal Hb concentration (g/dl) as the outcome variable for this analysis. As  
189 described in the preceding sections, DHS collected blood samples from eligible women  
190 to test for anaemia using various strategies. The Hb concentration is captured first in the  
191 DHS data as a continuous variable and then categorised into three levels of anaemia:  
192 mild, moderate and severe. In this analysis, we used the Hb concentration as a  
193 continuous variable.

### 194 *Predictor variables*

195 We grouped the predictor variables into three main categories: *maternal* (education,  
196 age, BMI, employment status, parity, breastfeeding status, marital status and ANC

197 attendance); *household* (wealth index, sex of household head, household size, number  
198 of children under five years, decision making on large household purchases and  
199 husband/partner education) and *community* (place of residence). The DHS created the  
200 household wealth index using assets ownership and housing characteristics: type of  
201 roofing, and flooring material, source of drinking water, sanitation facilities, ownership of  
202 television, bicycle, motorcycle, automobile among others. The details of the computation  
203 processes is published elsewhere [30]. The maternal BMI ( $\text{Kg/m}^2$ ) was obtained by  
204 dividing weight in kilogrammes by height in meters squared.

205

## 206 **Data analysis**

### 207 *Outline of quantile regression model*

208 Koenker and Bassett [34] introduced the quantile regression (QR) as a *location*  
209 *model* to extend Ordinary Least Squares (OLS). It is the case because OLS  
210 summarises the distribution at the grand mean. However, the QR assesses more  
211 general class of linear models in which, the conditional quantiles have a linear form to  
212 fully account for the overall distribution of the response variable. To formalise the QR,  
213 we consider a real-valued random variable  $Y$  characterized by the following distribution  
214 function [34, 35];

$$215 \quad F(y) = \Pr(Y \leq y) \quad (1)$$

216 Then for any  $\alpha \in (0, 1)$ , the  $\alpha$ -th quantile of  $Y$  is defined as:

$$217 \quad Q(\alpha) = \inf\{y: F(y) \geq \alpha\} \quad (2)$$

218 The common quantiles  $\alpha$  from Equation (1) are  $\alpha = .25$ ,  $\alpha = .50$ , and  $\alpha = .75$  for the  
219 first, quartile, the median and the third quartile. Therefore, unlike the OLS, which  
220 minimises the squared differences around the mean, QR minimises the  
221 weighted *absolute* difference between the observed value of  $y$  and the  $\alpha$ -th quintile of  $Y$ .  
222 The preceding discussion demonstrates that OLS is nested within QR [34, 35].

223



## 224 **Analytical approach utilised**

225 We used quantile regression (QR) [34] to examine the effects of the putative socio-  
226 demographic factors on maternal Hb concentration. Using the QR, we were able to  
227 investigate the effects of the predictor variables at different points of the conditional  
228 distribution of the outcome variable (Hb concentration). This type of analysis cannot be  
229 done with OLS, because standard OLS regression techniques summarise the average  
230 relationship between a set of regressors and the outcome variable based on the  
231 conditional mean function  $E(y|x)$ . Thus, it provides only a partial view of the  
232 relationship, as we might be interested in describing the relationship at different points  
233 in the conditional distribution of  $y$ . The QR, unlike OLS, provides a complete view of the  
234 effects of the predictor variable on the outcome variable. Thus, making it possible to  
235 identify the vulnerable groups that are in dire need of interventions. Further, QR is more  
236 robust in handling non-normal errors and outliers compared with OLS [34]. Finally, QR  
237 provides a richer characterisation of the data, thereby illuminating the effects of a  
238 covariate on the entire distribution of the outcome variable. In this analysis, we also  
239 included OLS estimates for comparison purposes, and estimated QR at the 5<sup>th</sup>, 10<sup>th</sup>,  
240 25<sup>th</sup>, 50<sup>th</sup>, 75<sup>th</sup> and 90<sup>th</sup> quantiles [27, 35].

241

242 Furthermore, since we did not have a specific predictor variable of interest, all the socio-  
243 demographic variables were included simultaneously in the models. They include,  
244 maternal education, age, BMI, employment status, parity, breastfeeding status, marital  
245 status, ANC attendance, household wealth index, sex of household head, household  
246 size, number of children under five years, decision making on large household  
247 purchases, husband/partner education and place of residence. The variables outlined  
248 above were selected based on the literature, followed by bivariate analysis. Significant  
249 variables in the bivariate analysis were included in the QR models.

## 250

## 251 **Results**

252 *Descriptive analysis of the characteristics of samples*

253 The descriptive results (Table 1) showed that mean maternal Hb concentration was  
 254 relatively the same across all the three countries: Ghana (11.95±1.49), DRC  
 255 (12.05±1.65) and Mozambique (11.64±1.73). Mothers in Ghana (5.27±4.92) spent a  
 256 little more years in education than those in DRC (4.88±3.77) and Mozambique  
 257 (3.46±3.45). The age of the study participants ranged from 28 years in Mozambique to  
 258 31 years in Ghana. Moreover, mothers in Ghana tended to have higher mean BMI  
 259 (24.34±4.96) relative to those in DRC (21.79±3.66) and Mozambique (22.53±3.70). In  
 260 DRC, 68% of mothers indicated they were breastfeeding at the time of the study, while  
 261 the number of breastfeeding mothers in Ghana and Mozambique stood at 58%,  
 262 respectively.

263 **Table 1: Characteristics of the socio-demographic variables of the three countries**

| Variables                                         | Ghana (n=2975) |      | DRC (n=9438) |      | Mozambique (n=10961) |      |
|---------------------------------------------------|----------------|------|--------------|------|----------------------|------|
|                                                   | Mean/%         | SD   | Mean/%       | SD   | Mean/%               | SD   |
| <b>Maternal-level variables</b>                   |                |      |              |      |                      |      |
| Hb concentration (g/dl)                           | 11.95          | 1.49 | 12.05        | 1.65 | 11.64                | 1.73 |
| Women education (in years)                        | 5.27           | 4.92 | 4.88         | 3.77 | 3.46                 | 3.45 |
| Age (in years)                                    | 30.65          | 6.96 | 29.13        | 6.94 | 28.38                | 7.18 |
| Women's Body Mass Index (BMI)(Kg/m <sup>2</sup> ) | 24.34          | 4.96 | 21.79        | 3.66 | 22.53                | 3.70 |
| Working (yes)                                     | 79.3           |      | 76.0         |      | 37.5                 |      |
| Parity                                            | 3.62           | 2.17 | 4.42         | 2.56 | 3.8                  | 2.28 |
| Breastfeeding (yes)                               | 57.9           |      | 67.8         |      | 57.6                 |      |
| <b>Marital status</b>                             |                |      |              |      |                      |      |
| Never married                                     | 6.4            |      | 4.2          |      | 5.6                  |      |
| Married or Cohabiting                             | 87.4           |      | 87.1         |      | 82.8                 |      |
| Divorced/Widowed/Separated                        | 6.2            |      | 8.7          |      | 11.6                 |      |
| <b>Household-level variables</b>                  |                |      |              |      |                      |      |
| <b>Wealth index</b>                               |                |      |              |      |                      |      |
| Poorest                                           | 33.0           |      | 27.4         |      | 18.2                 |      |
| Poor                                              | 21.1           |      | 22.9         |      | 18.9                 |      |
| Middle                                            | 19.0           |      | 20.7         |      | 19.7                 |      |
| Rich                                              | 15.1           |      | 17.1         |      | 22.1                 |      |
| Richest                                           | 12.3           |      | 12.1         |      | 21.1                 |      |
| Head of household (Female)                        | 23.7           |      | 22.2         |      | 32.9                 |      |
| Household size                                    | 5.80           | 2.82 | 6.74         | 2.86 | 6.16                 | 2.79 |
| Number of children under five years               | 1.73           | 0.93 | 2.16         | 1.04 | 1.86                 | 0.98 |
| <b>Decision on household large purchases</b>      |                |      |              |      |                      |      |
| Respondent alone                                  | 16.0           |      | 12.5         |      | 11.1                 |      |

|                                  |      |      |      |      |      |      |
|----------------------------------|------|------|------|------|------|------|
| Respondent and Husband/Partner   | 46.5 |      | 50.3 |      | 57.1 |      |
| Husband/Partner alone            | 24.1 |      | 36.7 |      | 30.7 |      |
| Someone else/Other               | 13.4 |      | 0.59 |      | 1.1  |      |
| Husband education (in years)     | 7.04 | 5.44 | 8.53 | 4.11 | 4.28 | 3.95 |
| <b>Community-level variables</b> |      |      |      |      |      |      |
| Place of Residence (% urban)     | 39.8 |      | 28.7 |      | 32.1 |      |

SD: standard deviation; Hb: Haemoglobin; Note: SDs are reported only for continuous variables

264 *Quantile multivariable regression analysis of the effects of socio-demographic factors on*  
 265 *maternal Hb concentration*

266 In Tables 2-4, we present the QR results of the effects of socio-demographic factors on  
 267 maternal Hb concentration in Ghana, DRC and Mozambique. We also reported the OLS  
 268 estimates for the purposes of comparison with the QR results. The results from the  
 269 OLS analysis showed that maternal education had strong positive effects on Hb  
 270 concentration in Ghana and Mozambique. Thus, in both countries, one-year increase in  
 271 education was associated with a unit increase maternal Hb concentration. A similar  
 272 effects of BMI on Hb concentration were observed in all the three countries, so was  
 273 breastfeeding practice.

274

275 However, in the QR analysis (Tables 2-4), the results revealed vital differences in  
 276 effects at different points in the conditional distribution of maternal Hb concentration. For  
 277 example, in Ghana, the effect of maternal years of education occurred at the first two  
 278 lowest quantiles (5<sup>th</sup> and 10<sup>th</sup>), with the largest effect at the 5<sup>th</sup> quantile. Similarly, in  
 279 Mozambique, one-year increase in maternal education was associated with a unit  
 280 increase in Hb concentration across all quantiles, with the largest effect on mothers in  
 281 the lowest quantile (5<sup>th</sup>) and the smallest effect at the highest quantile (90<sup>th</sup>).  
 282 Interestingly, in DRC, maternal years of education had an inverse relationship with Hb  
 283 concentration of mothers in the three upper quantiles. Thus, one-year increase in  
 284 maternal years of education was associated with 0.015, 0.020 and 0.023 units  
 285 decrease in maternal Hb concentration at the 50<sup>th</sup>, 75<sup>th</sup> and 90<sup>th</sup> quantiles, respectively.  
 286 In Ghana, maternal BMI had a significant positive effect on Hb concentration of mothers  
 287 in the 5<sup>th</sup>, 10<sup>th</sup>, 50<sup>th</sup> and 90<sup>th</sup> quantiles. The effect on the remaining two quantiles did not  
 288 reach statistical significance. The positive effects of BMI on maternal Hb concentration

289 was at the three lowest quantiles (5<sup>th</sup>, 10<sup>th</sup> and 25<sup>th</sup>) in DRC, while in Mozambique, a  
290 unit increase in maternal BMI was associated with 0.031, 0.033, 0.029 and 0.018 units  
291 increase in maternal Hb concentration at the 5<sup>th</sup>, 10<sup>th</sup>, 25<sup>th</sup> and 50<sup>th</sup> quantiles,  
292 respectively. In each of the countries, the largest effect of BMI on maternal Hb  
293 concentration occurred at the lower end of the Hb distribution.

294

295 In Ghana, breastfeeding was positively and significantly associated with Hb  
296 concentration of mothers in the first four quantiles (5<sup>th</sup>, 10<sup>th</sup>, 25<sup>th</sup>, and 50<sup>th</sup>), with the  
297 least effect occurring at the 50<sup>th</sup> quantile. However, in DRC and Mozambique,  
298 breastfeeding had a decreasing effect across all quantiles in the respective countries.  
299 The largest effect in each country was at the lower end of the conditional distribution of  
300 the Hb concentration, while the smallest effect was at the higher end of the distribution.  
301 In Ghana, women participation in decision making regarding large household purchases  
302 was associated with a better Hb concentration among mothers in the 25<sup>th</sup> and 50<sup>th</sup>  
303 quantiles, while the partner taking the decision alone was associated positively with the  
304 Hb concentration at 5<sup>th</sup>, 25<sup>th</sup> and 50<sup>th</sup> quantiles. On the contrary, there was an inverse  
305 effect of the partner alone, deciding on large household purchases on Hb concentration  
306 of mothers in the 25<sup>th</sup> and 50<sup>th</sup> quantiles in DRC. The effects of female household  
307 headship in DRC was mixed. It associated positively with Hb concentration of mothers  
308 in the first three quantiles (5<sup>th</sup>, 10<sup>th</sup> and 25<sup>th</sup>), and negatively with the two upper  
309 quantiles (75<sup>th</sup> and 90<sup>th</sup>). In Mozambique, the household wealth index had a significant  
310 and increasing (from 5<sup>th</sup> to 90<sup>th</sup>) effect on maternal Hb concentration across almost all  
311 the quantiles. The largest effect occurred at the highest end of the Hb distribution (90<sup>th</sup>  
312 quantile). In Ghana, being in the lower wealth index was associated with a low Hb  
313 concentration among mothers in the 5<sup>th</sup> and 10<sup>th</sup> quantiles.

314

315

316

317

318

319

**Table 2: Effects of socio-demographic factors on maternal Hb concentration in Ghana**

| Variables                                          | OLS                 | Q5                  | Q10                 | Q25                 | Q 50                | Q75               | Q90               |
|----------------------------------------------------|---------------------|---------------------|---------------------|---------------------|---------------------|-------------------|-------------------|
| <b>Maternal level variables</b>                    |                     |                     |                     |                     |                     |                   |                   |
| Women education (in years)                         | 0.015*<br>(0.008)   | 0.063***<br>(0.016) | 0.044**<br>(0.016)  | 0.024<br>(0.013)    | 0.004<br>(0.010)    | -0.004<br>(0.009) | -0.007<br>(0.015) |
| Age (in years)                                     | 0.009<br>(0.006)    | 0.013<br>(0.011)    | 0.024<br>(0.013)    | 0.012<br>(0.011)    | 0.006<br>(0.008)    | -0.005<br>(0.008) | -0.001<br>(0.009) |
| Women's Body Mass Index (BMI) (Kg/m <sup>2</sup> ) | 0.020**<br>(0.006)  | 0.037**<br>(0.012)  | 0.022*<br>(0.010)   | 0.009<br>(0.009)    | 0.019*<br>(0.008)   | 0.012<br>(0.008)  | 0.024*<br>(0.010) |
| Mother working-No (reference)                      |                     |                     |                     |                     |                     |                   |                   |
| Mother working-Yes                                 | 0.121<br>(0.070)    | 0.008<br>(0.139)    | 0.003<br>(0.147)    | 0.129<br>(0.111)    | 0.142<br>(0.079)    | 0.095<br>(0.084)  | 0.159<br>(0.106)  |
| Parity                                             | -0.002<br>(0.021)   | -0.009<br>(0.060)   | -0.014<br>(0.064)   | 0.019<br>(0.035)    | 0.009<br>(0.031)    | 0.036<br>(0.030)  | 0.036<br>(0.029)  |
| Breastfeeding-No (reference)                       |                     |                     |                     |                     |                     |                   |                   |
| Breastfeeding-Yes                                  | 0.216***<br>(0.060) | 0.435***<br>(0.132) | 0.424***<br>(0.128) | 0.442***<br>(0.106) | 0.252**<br>(0.077)  | -0.099<br>(0.085) | -0.070<br>(0.101) |
| <b>Marital status</b>                              |                     |                     |                     |                     |                     |                   |                   |
| Never married (reference)                          |                     |                     |                     |                     |                     |                   |                   |
| Married or Cohabiting                              | -0.180<br>(0.328)   | -0.306<br>(0.650)   | -0.416<br>(0.766)   | -0.432<br>(0.523)   | -0.435<br>(0.504)   | 0.141<br>(0.491)  | -0.176<br>(0.573) |
| Divorced/Widowed/Separated                         | 0.154<br>(0.159)    | 0.507<br>(0.406)    | 0.189<br>(0.330)    | 0.413<br>(0.214)    | 0.084<br>(0.176)    | 0.138<br>(0.193)  | -0.384<br>(0.266) |
| Antenatal visits=0-3 (reference)                   |                     |                     |                     |                     |                     |                   |                   |
| Antenatal visits=4+                                | 0.212*<br>(0.093)   | 0.458<br>(0.247)    | 0.383<br>(0.214)    | 0.121<br>(0.167)    | 0.193<br>(0.121)    | 0.094<br>(0.131)  | 0.300*<br>(0.138) |
| <b>Household level variables</b>                   |                     |                     |                     |                     |                     |                   |                   |
| Wealth index-poorest (reference)                   |                     |                     |                     |                     |                     |                   |                   |
| Wealth index-Poor                                  | -0.199*<br>(0.082)  | -0.243<br>(0.177)   | -0.411*<br>(0.180)  | -0.169<br>(0.141)   | -0.188<br>(0.098)   | -0.136<br>(0.096) | -0.071<br>(0.145) |
| Wealth index-Middle                                | -0.128<br>(0.096)   | 0.012<br>(0.198)    | 0.109<br>(0.191)    | -0.076<br>(0.156)   | -0.303**<br>(0.117) | -0.079<br>(0.130) | 0.100<br>(0.176)  |
| Wealth index-Rich"                                 | 0.122<br>(0.119)    | 0.123<br>(0.266)    | 0.068<br>(0.257)    | 0.348<br>(0.195)    | 0.146<br>(0.128)    | 0.149<br>(0.135)  | 0.210<br>(0.228)  |
| Wealth index-Richest                               | 0.109<br>(0.141)    | 0.112<br>(0.302)    | 0.294<br>(0.300)    | 0.228<br>(0.245)    | 0.088<br>(0.149)    | 0.317<br>(0.176)  | 0.159<br>(0.229)  |
| Head of household-Male (reference)                 |                     |                     |                     |                     |                     |                   |                   |
| Head of household-Female                           | 0.067<br>(0.075)    | 0.016<br>(0.188)    | 0.149<br>(0.174)    | 0.102<br>(0.119)    | 0.005<br>(0.095)    | -0.004<br>(0.091) | 0.035<br>(0.109)  |
| Household size                                     | 0.011<br>(0.013)    | 0.001<br>(0.045)    | 0.031<br>(0.033)    | 0.019<br>(0.017)    | 0.004<br>(0.014)    | 0.000<br>(0.017)  | -0.003<br>(0.017) |
| Number of children under five                      | -0.060<br>(0.038)   | -0.001<br>(0.108)   | 0.053<br>(0.094)    | -0.095<br>(0.058)   | -0.128**<br>(0.045) | -0.087<br>(0.053) | 0.006<br>(0.058)  |

*Decision on large household purchases*

Respondent alone (reference)

|                                      |                    |                    |                   |                    |                     |                    |                   |
|--------------------------------------|--------------------|--------------------|-------------------|--------------------|---------------------|--------------------|-------------------|
| Respondent and Husband/Partner       | 0.232**<br>(0.080) | 0.227<br>(0.237)   | 0.268<br>(0.190)  | 0.247*<br>(0.124)  | 0.296**<br>(0.106)  | 0.120<br>(0.096)   | 0.160<br>(0.116)  |
| Husband/Partner alone                | 0.269**<br>(0.088) | 0.480*<br>(0.236)  | 0.294<br>(0.203)  | 0.379**<br>(0.121) | 0.357**<br>(0.118)  | 0.098<br>(0.101)   | -0.033<br>(0.144) |
| Someone else/Other                   | 0.008<br>(0.317)   | -0.281<br>(0.617)  | -0.153<br>(0.763) | -0.397<br>(0.501)  | -0.158<br>(0.500)   | 0.227<br>(0.470)   | 0.252<br>(0.550)  |
| Husband education (in years)         | -0.002<br>(0.007)  | -0.033*<br>(0.014) | -0.025<br>(0.016) | -0.001<br>(0.011)  | 0.013<br>(0.009)    | 0.001<br>(0.008)   | -0.006<br>(0.011) |
| Place of Residence-rural (reference) |                    |                    |                   |                    |                     |                    |                   |
| Place of Residence-Urban             | -0.097<br>(0.077)  | -0.128<br>(0.202)  | -0.037<br>(0.175) | -0.041<br>(0.111)  | -0.209**<br>(0.081) | -0.181*<br>(0.090) | -0.096<br>(0.140) |

|                     |             |             |             |             |             |             |             |
|---------------------|-------------|-------------|-------------|-------------|-------------|-------------|-------------|
| <b>Observations</b> | <b>2975</b> | <b>2975</b> | <b>2975</b> | <b>2975</b> | <b>2975</b> | <b>2975</b> | <b>2975</b> |
|---------------------|-------------|-------------|-------------|-------------|-------------|-------------|-------------|

Standard errors in parentheses; OLS: Ordinary least squares; Q: Quantile

\* p<0.05; \*\*p<0.01; \*\*\*p<0.001

**Table 3: Effects of socio-demographic factors on maternal Hb concentration in DRC**

| Variables                                         | OLS                | Q5                  | Q10                | Q25               | Q 50                | Q75                 | Q90                |
|---------------------------------------------------|--------------------|---------------------|--------------------|-------------------|---------------------|---------------------|--------------------|
| <b>Maternal level variables</b>                   |                    |                     |                    |                   |                     |                     |                    |
| Women education (in years)                        | -0.007<br>(0.006)  | 0.016<br>(0.018)    | -0.007<br>(0.013)  | 0.006<br>(0.008)  | -0.015**<br>(0.006) | -0.020**<br>(0.007) | -0.023*<br>(0.011) |
| Age (in years)                                    | 0.004<br>(0.004)   | -0.010<br>(0.012)   | -0.007<br>(0.010)  | 0.006<br>(0.005)  | 0.012*<br>(0.005)   | 0.005<br>(0.005)    | 0.003<br>(0.006)   |
| Women's Body Mass Index (BMI)(Kg/m <sup>2</sup> ) | 0.015**<br>(0.005) | 0.026***<br>(0.008) | 0.021**<br>(0.007) | 0.014*<br>(0.006) | 0.007<br>(0.005)    | 0.009<br>(0.007)    | 0.001<br>(0.010)   |
| Mother working-No (reference)                     |                    |                     |                    |                   |                     |                     |                    |
| Mother Working -Yes                               | -0.033<br>(0.041)  | 0.060<br>(0.107)    | 0.046<br>(0.082)   | -0.010<br>(0.052) | -0.037<br>(0.044)   | 0.030<br>(0.051)    | -0.038<br>(0.070)  |
| Parity                                            | 0.016<br>(0.012)   | 0.052<br>(0.037)    | 0.041<br>(0.026)   | 0.017<br>(0.018)  | 0.003<br>(0.014)    | 0.014<br>(0.016)    | 0.023<br>(0.018)   |
| Mother breastfeeding-No (reference)               |                    |                     |                    |                   |                     |                     |                    |
| Mother breastfeeding-Yes                          | 0.470***           | 0.745***            | 0.662***           | 0.686***          | 0.488***            | 0.355***            | 0.219***           |

|                                              |           |         |         |          |           |         |          |
|----------------------------------------------|-----------|---------|---------|----------|-----------|---------|----------|
|                                              | (0.038)   | (0.117) | (0.079) | (0.057)  | (0.045)   | (0.057) | (0.061)  |
| <i>Marital status</i>                        |           |         |         |          |           |         |          |
| Never married (reference)                    |           |         |         |          |           |         |          |
| Married or Cohabiting"                       | -0.128    | -0.219  | -0.372* | -0.186   | -0.242**  | -0.145  | 0.108    |
|                                              | (0.092)   | (0.244) | (0.169) | (0.127)  | (0.092)   | (0.103) | (0.132)  |
| Divorced/Widowed/Separated                   | 0.071     | -0.010  | -0.060  | -0.026   | 0.007     | 0.179   | 0.320*   |
|                                              | (0.103)   | (0.307) | (0.191) | (0.141)  | (0.106)   | (0.126) | (0.149)  |
| Antenatal visits=0-3 (reference)             |           |         |         |          |           |         |          |
| Antenatal visits=4+                          | 0.025     | 0.011   | 0.027   | 0.030    | 0.014     | 0.016   | 0.095    |
|                                              | (0.039)   | (0.098) | (0.078) | (0.053)  | (0.043)   | (0.045) | (0.063)  |
| <b><i>Household level variables</i></b>      |           |         |         |          |           |         |          |
| Wealth index-Poorest (reference)             |           |         |         |          |           |         |          |
| Wealth index-Poor                            | -0.030    | 0.024   | 0.091   | -0.062   | -0.056    | -0.081  | -0.048   |
|                                              | (0.048)   | (0.158) | (0.116) | (0.074)  | (0.048)   | (0.061) | (0.085)  |
| Wealth index- Middle                         | 0.104*    | 0.219   | 0.282*  | 0.106    | 0.058     | -0.011  | 0.027    |
|                                              | (0.050)   | (0.137) | (0.118) | (0.070)  | (0.054)   | (0.068) | (0.087)  |
| Wealth index- Rich                           | 0.064     | 0.279   | 0.393** | 0.112    | -0.004    | -0.106  | -0.020   |
|                                              | (0.058)   | (0.148) | (0.137) | (0.082)  | (0.061)   | (0.073) | (0.090)  |
| Wealth index- Richest                        | -0.062    | 0.192   | 0.206   | -0.072   | -0.207*   | -0.039  | -0.070   |
|                                              | (0.079)   | (0.241) | (0.168) | (0.114)  | (0.095)   | (0.096) | (0.125)  |
| Head of household-Male (reference)           |           |         |         |          |           |         |          |
| Head of household-Female                     | 0.019     | 0.278*  | 0.249** | 0.211*** | -0.033    | -0.129* | -0.179** |
|                                              | (0.045)   | (0.136) | (0.083) | (0.057)  | (0.046)   | (0.057) | (0.068)  |
| Household size                               | 0.001     | 0.035   | 0.001   | -0.004   | -0.002    | 0.002   | -0.009   |
|                                              | (0.008)   | (0.020) | (0.016) | (0.012)  | (0.011)   | (0.010) | (0.011)  |
| Number of children under five                | -0.015    | -0.107  | -0.051  | 0.021    | -0.037    | -0.042  | 0.020    |
|                                              | (0.021)   | (0.056) | (0.053) | (0.031)  | (0.023)   | (0.026) | (0.035)  |
| <i>Decision on large household purchases</i> |           |         |         |          |           |         |          |
| Respondent alone (reference)                 |           |         |         |          |           |         |          |
| Respondent and Husband/Partner               | -0.119*   | -0.287  | -0.159  | 0.042    | -0.123    | -0.149* | -0.069   |
|                                              | (0.056)   | (0.148) | (0.114) | (0.077)  | (0.069)   | (0.064) | (0.102)  |
| Husband/Partner alone                        | -0.195*** | -0.235  | -0.243* | -0.103   | -0.250*** | -0.131  | -0.156   |
|                                              | (0.056)   | (0.159) | (0.101) | (0.078)  | (0.067)   | (0.067) | (0.104)  |
| Someone else/Other                           | 0.044     | 0.449   | 0.222   | -0.448   | 0.365     | -0.018  | -0.065   |
|                                              | (0.224)   | (0.261) | (0.263) | (0.559)  | (0.217)   | (0.313) | (0.185)  |
| Husband education (in years)                 | 0.005     | -0.005  | 0.002   | -0.010   | 0.006     | 0.011   | 0.019*   |
|                                              | (0.005)   | (0.015) | (0.012) | (0.007)  | (0.005)   | (0.006) | (0.009)  |
| Place of Residence-Rural (reference)         |           |         |         |          |           |         |          |
| Place of Residence-Urban                     | -0.004    | -0.124  | -0.132  | 0.027    | 0.131**   | 0.018   | -0.140   |



|                     | (0.051)     | (0.138)     | (0.108)     | (0.069)     | (0.049)     | (0.056)     | (0.093)     |
|---------------------|-------------|-------------|-------------|-------------|-------------|-------------|-------------|
| <b>Observations</b> | <b>9438</b> | <b>9438</b> | <b>9438</b> | <b>9438</b> | <b>9438</b> | <b>9438</b> | <b>9438</b> |

Standard errors in parentheses; OLS: Ordinary least squares; Q: Quantile

\* p<0.05; \*\*p<0.01; \*\*\*p<0.001

**Table 4: Effects of socio-demographic factors on maternal Hb concentration in Mozambique**

| Variables                                         | OLS                 | Q5                  | Q10                 | Q25                 | Q 50                | Q75                 | Q90                 |
|---------------------------------------------------|---------------------|---------------------|---------------------|---------------------|---------------------|---------------------|---------------------|
| <b>Maternal level variables</b>                   |                     |                     |                     |                     |                     |                     |                     |
| Women education (in years)                        | 0.035***<br>(0.007) | 0.055**<br>(0.021)  | 0.043**<br>(0.015)  | 0.030**<br>(0.011)  | 0.037***<br>(0.008) | 0.046***<br>(0.009) | 0.027*<br>(0.011)   |
| Age (in years)                                    | 0.001<br>(0.004)    | 0.002<br>(0.009)    | 0.001<br>(0.007)    | 0.001<br>(0.006)    | 0.005<br>(0.004)    | 0.000<br>(0.005)    | 0.001<br>(0.005)    |
| Women's Body Mass Index (BMI)(Kg/m <sup>2</sup> ) | 0.019***<br>(0.005) | 0.031*<br>(0.015)   | 0.033**<br>(0.011)  | 0.029***<br>(0.007) | 0.018**<br>(0.006)  | 0.008<br>(0.007)    | 0.008<br>(0.008)    |
| Mother working-No (reference)                     |                     |                     |                     |                     |                     |                     |                     |
| Mother working-Yes                                | -0.049<br>(0.034)   | 0.004<br>(0.094)    | -0.038<br>(0.071)   | -0.092<br>(0.052)   | 0.001<br>(0.039)    | -0.013<br>(0.042)   | -0.080<br>(0.052)   |
| Parity                                            | 0.025*<br>(0.012)   | 0.069*<br>(0.027)   | 0.061**<br>(0.024)  | 0.024<br>(0.015)    | 0.003<br>(0.011)    | 0.023<br>(0.017)    | 0.004<br>(0.018)    |
| Mother breastfeeding-No (reference)               |                     |                     |                     |                     |                     |                     |                     |
| Mother breastfeeding-Yes                          | 0.424***<br>(0.036) | 0.732***<br>(0.100) | 0.663***<br>(0.077) | 0.520***<br>(0.055) | 0.459***<br>(0.041) | 0.310***<br>(0.051) | 0.219***<br>(0.054) |
| <b>Marital status</b>                             |                     |                     |                     |                     |                     |                     |                     |
| Never married (reference)                         |                     |                     |                     |                     |                     |                     |                     |
| Married or Cohabiting                             | -0.067<br>(0.087)   | -0.445*<br>(0.210)  | -0.275<br>(0.160)   | -0.159<br>(0.136)   | 0.139<br>(0.106)    | -0.055<br>(0.121)   | 0.075<br>(0.134)    |
| Divorced/Widowed/Separated                        | -0.139<br>(0.092)   | -0.495*<br>(0.220)  | -0.221<br>(0.205)   | -0.144<br>(0.149)   | -0.062<br>(0.113)   | -0.138<br>(0.121)   | -0.005<br>(0.141)   |
| Antenatal visits=0-3 (reference)                  |                     |                     |                     |                     |                     |                     |                     |
| Antenatal visits = 4+                             | 0.049<br>(0.036)    | 0.045<br>(0.086)    | 0.028<br>(0.067)    | 0.035<br>(0.048)    | 0.015<br>(0.038)    | 0.036<br>(0.041)    | 0.075<br>(0.051)    |
| <b>Household level variables</b>                  |                     |                     |                     |                     |                     |                     |                     |
| Wealth index-Poorest (reference)                  |                     |                     |                     |                     |                     |                     |                     |
| Wealth index-Poor                                 | 0.255***            | -0.114              | 0.198               | 0.174*              | 0.285***            | 0.326***            | 0.429***            |

|                                              |              |              |              |              |              |              |              |
|----------------------------------------------|--------------|--------------|--------------|--------------|--------------|--------------|--------------|
|                                              | (0.054)      | (0.157)      | (0.110)      | (0.076)      | (0.063)      | (0.063)      | (0.074)      |
| Wealth index- Middle                         | 0.367***     | 0.246        | 0.397***     | 0.249***     | 0.335***     | 0.399***     | 0.552***     |
|                                              | (0.054)      | (0.131)      | (0.109)      | (0.073)      | (0.055)      | (0.067)      | (0.075)      |
| Wealth index-Rich                            | 0.380***     | 0.242        | 0.406***     | 0.268***     | 0.337***     | 0.400***     | 0.594***     |
|                                              | (0.056)      | (0.146)      | (0.118)      | (0.079)      | (0.059)      | (0.067)      | (0.085)      |
| Wealth index-Richest                         | 0.257***     | -0.122       | 0.036        | 0.147        | 0.198**      | 0.374***     | 0.474***     |
|                                              | (0.073)      | (0.191)      | (0.150)      | (0.109)      | (0.074)      | (0.098)      | (0.111)      |
| Head of household-Male<br>(reference)        |              |              |              |              |              |              |              |
| Head of household-Female                     | -0.010       | -0.061       | -0.150       | -0.040       | 0.075        | -0.050       | -0.074       |
|                                              | (0.039)      | (0.100)      | (0.083)      | (0.057)      | (0.045)      | (0.047)      | (0.067)      |
| Household size                               | 0.015        | 0.014        | 0.007        | 0.004        | 0.028***     | 0.007        | 0.011        |
|                                              | (0.008)      | (0.016)      | (0.016)      | (0.012)      | (0.008)      | (0.011)      | (0.017)      |
| Number of children under five                | -0.025       | -0.077       | -0.070       | 0.001        | -0.053*      | 0.015        | 0.003        |
|                                              | (0.022)      | (0.054)      | (0.051)      | (0.035)      | (0.024)      | (0.034)      | (0.034)      |
| <i>Decision on large household purchases</i> |              |              |              |              |              |              |              |
| Respondent alone (reference)                 |              |              |              |              |              |              |              |
| Respondent and Husband/Partner               | 0.010        | -0.146       | -0.092       | -0.050       | 0.075        | 0.027        | 0.088        |
|                                              | (0.056)      | (0.143)      | (0.106)      | (0.084)      | (0.064)      | (0.062)      | (0.093)      |
| Husband/Partner alone                        | -0.032       | -0.021       | -0.061       | -0.031       | -0.050       | -0.020       | 0.043        |
|                                              | (0.059)      | (0.149)      | (0.112)      | (0.088)      | (0.065)      | (0.069)      | (0.099)      |
| Someone else/Other                           | 0.244        | 0.817        | 0.349        | 0.133        | 0.062        | 0.430*       | 0.314        |
|                                              | (0.168)      | (0.605)      | (0.230)      | (0.267)      | (0.227)      | (0.172)      | (0.260)      |
| Husband education (in years)                 | 0.011*       | -0.002       | 0.019        | 0.015        | 0.013        | 0.002        | 0.011        |
|                                              | (0.006)      | (0.015)      | (0.012)      | (0.008)      | (0.006)      | (0.007)      | (0.010)      |
| Place of Residence-Rural<br>(reference)      |              |              |              |              |              |              |              |
| Place of Residence-Urban                     | -0.059       | -0.278*      | -0.203*      | -0.184**     | 0.019        | -0.021       | 0.139        |
|                                              | (0.046)      | (0.129)      | (0.088)      | (0.067)      | (0.046)      | (0.058)      | (0.072)      |
| <b>Observations</b>                          | <b>10961</b> | <b>10961</b> | <b>10961</b> | <b>10961</b> | <b>10961</b> | <b>10961</b> | <b>10961</b> |

Standard errors in parentheses; OLS: Ordinary least squares; Q: Quantile

\* p<0.05; \*\*p<0.01; \*\*\*p<0.001

320

321

322

323

324

325

326 Figures 1-3 are visual presentations of the effects of the various socio-demographic  
327 factors on maternal Hb concentration in the three countries included in the analysis.

328

329 **Figure 1: Pictorial presentation of the effects of socio-demographic factors on**  
330 **maternal Hb concentration in Ghana**

331

332

333

334 **Figure 2: Pictorial presentation of the effects of socio-demographic factors on**  
335 **maternal Hb concentration in DRC**

336

337

338

339

340 **Figure 3: Pictorial presentation of the effects of socio-demographic factors on**  
341 **maternal Hb concentration in Mozambique**

342

343

344

345

346

347

348

349

350

351

352

353

354

355 **Discussion**

356 This paper examined the effects of socio-demographic factors on maternal Hb  
357 concentration in Ghana, DRC and Mozambique, using quantile regression  
358 to understand the differential effects of putative socio-demographic factors at different  
359 points of the conditional distribution of the Hb concentration. Our QR results showed  
360 that in Ghana, one-year increase in maternal education was associated with an  
361 improved Hb concentration of mothers in the 5<sup>th</sup> and 10<sup>th</sup> quantiles, while the effects on  
362 the other four quantiles did not reach statistical significance. However, the OLS results  
363 show that one-year increase maternal education was associated with a unit increase in  
364 Hb concentration of all mothers. This paints just a part of the picture and therefore can  
365 be misleading. However, in Mozambique, the positive effect of years of schooling on Hb  
366 concentration was across all quantiles and in a decreasing manner. Thus, the largest  
367 effect of education occurred at the lowest quantiles, while the smallest effect was on Hb  
368 concentration of mothers in the highest quantile. Our findings in the two countries imply  
369 a disproportionate positive effects of maternal education accruing to mothers in the  
370 lower tail of the Hb distribution. This suggests that improving maternal education may  
371 be more impactful on the Hb concentration of mothers in the lower than the upper  
372 quantiles. Conversely, a year increase in maternal years of schooling was associated  
373 with a unit decrease in Hb concentration of mothers in the three upper quantiles in DRC.  
374 These findings are puzzling as the literature suggests that education consistently predict  
375 positive health outcomes in women [18, 25, 36, 37]. For example, a study using  
376 multicountry data concluded that women with higher years of education were less likely  
377 to be anaemic relative to those with fewer years of schooling [36]. Further research is  
378 needed to elucidate the possible factors accounting for the negative effect of maternal  
379 education on maternal Hb outcomes in DRC. Our study together with the above studies,  
380 despite using different analytical strategies, strongly suggest that education has positive  
381 effects on maternal health outcomes.

382

383 Our analysis also showed that maternal BMI has a significant positive effect on Hb  
384 concentration in at least three quantiles in each country. The most significant effect of

385 BMI was among mothers in the lower quantiles in each country. This suggests that  
386 interventions targeted at improving maternal BMI qualitatively are likely to be more  
387 effective in increasing the Hb concentration of mothers in the lower tail of the Hb  
388 distribution. It is worthy to note that the effects of BMI were not across all quantiles.  
389 Hence, the OLS estimates, which suggested that a unit change in maternal BMI is  
390 associated with a unit increase in Hb concentration among all mothers, may be  
391 misleading. The QR findings, are, therefore, critical for identifying the groups that need  
392 to be targeted in programme planning. The literature corroborated the findings of our  
393 study. Several studies using either linear or logistic regression analytical strategies  
394 suggested that women with higher BMI tend to have higher levels of Hb concentration  
395 [22, 23, 36].

396

397 Similarly, breastfeeding had significant positive effect on maternal Hb concentration in  
398 all the three countries. Mothers who were breastfeeding at the time of the survey tended  
399 to have better Hb concentration compared with non-breastfeeding mothers. The largest  
400 effects were observed among mothers in the lower quantiles, suggesting that  
401 interventions to promote breastfeeding among lactating mothers may have more impact  
402 on Hb concentration of mothers at the lower end of the Hb distribution. These findings  
403 may appear puzzling because it is generally believed that lactating mothers tend to lose  
404 some iron to their infants, which may have a bearing on their Hb concentration [38, 39].  
405 Nevertheless, other evidence suggests that the iron contained in breast milk to children  
406 is not significant enough to deplete the iron level of the mother, unless the mother is  
407 already anaemic [40]. The literature further suggests that mothers who are anaemic  
408 during pregnancy and postpartum can recover through a high intake of iron rich diet  
409 and/or iron supplement, and may not suffer low Hb concentration during lactation [40-  
410 42]. The preceding discussion suggests that breastfeeding may not necessarily deplete  
411 maternal iron level, with the consequential negative effect on Hb concentration. Some  
412 available evidence suggests a positive effect of breastfeeding on maternal Hb [38].  
413 Nonetheless, other studies have observed inverse relationships between breastfeeding  
414 and Hb concentration levels [39, 43]. These mixed findings notwithstanding, the findings

415 in the present study, together with the literature suggest that breastfeeding can indeed  
416 have positive effects on maternal Hb concentration levels, although the mechanism  
417 through which this happens may be complicated.

418

419 Our findings in Mozambique suggest that household wealth index (HWI) had a positive  
420 and increasing (from 5<sup>th</sup> to 90<sup>th</sup>) effect on Hb concentration across all quantiles. The  
421 smallest effect was on mothers in the lower end of the Hb distribution, while the largest  
422 effect was on mothers at the upper end of the distribution. Thus, improving HWI may be  
423 more impactful on mothers at the upper quantiles relative to those at the lower  
424 quantiles. The positive association between HWI and women health outcomes have  
425 been substantially documented [38, 44, 45]. The evidence is that mothers who live in  
426 better-off households tend to have higher levels of Hb concentration [38]. However, in  
427 Ghana, mothers who live in poor households and are in the 5<sup>th</sup> and 10<sup>th</sup> quantiles  
428 tended to have lower Hb concentration. The finding in Ghana is consistent with the  
429 literature, which often identifies poverty as a risk factor of maternal health outcomes [25,  
430 46].

431

432 An essential strength of this study is that the outcome variable was objectively  
433 measured, thereby reducing the possible biases associated with subjective  
434 measurements. The use of QR helped to examine the effects of the socio-demographic  
435 factors at different points of the Hb concentration, and thus present a comprehensive  
436 picture of the effects. Another necessary strength is the use of nationally representative  
437 data, making it possible for the results to be generalised to all women of reproductive  
438 age in the respective countries. We could not establish causality in this study due to the  
439 cross-sectional nature of the data. Also, missing data is an essential limitation of  
440 secondary data analysis. However, due to the robust measures put place by DHS to  
441 ensure the completeness of their datasets, missing data was not an issue in our study.

442 **Conclusions**

443 We used quantile regression to examine the effects of socio-demographic factors on  
444 maternal Hb concentration. Our analysis demonstrated substantially that the various  
445 putative socio-demographic factors have differential effects on maternal Hb  
446 concentration at different points of the Hb distribution in all countries. Interventions and  
447 programmes to address maternal anaemia must take into account the different effects  
448 of the various socio-demographic factors on Hb concentration throughout the different  
449 percentiles of the Hb distribution. It may help identify suitable interventions for groups  
450 most in need.

451

## 452 **Acknowledgements**

453 We wish to express our gratitude to The DHS Program, USA, for providing us access to  
454 the data. We also want to acknowledge the institutions of respective countries that  
455 played critical roles in the data collection processes.

456

## 457 **Competing Interest**

458 The authors have no competing interests to declare.

## 459 **Funding**

460 This study did not receive funding from any source.

461

## 462 **Data Sharing Statement**

463 This study was a re-analysis of existing data that are publicly available from The DHS  
464 Program at <http://dhsprogram.com/publications/publication-fr221-dhs-final-reports.cfm>.  
465 Data are accessible free of charge upon registration with the Demographic and Health  
466 Survey program (The DHS Program). The registration is done on the DHS website  
467 indicated above.

468

469

## 470 **Authors' Contribution**

471 DAA conceived and designed the study, interpreted the results, wrote the first draft of  
472 the manuscript, and contributed to the revision of the manuscript. DAA and ZTD  
473 analysed the data. ZTD and CK contributed to study design, data interpretation, and  
474 critical revision of the manuscript. All authors take responsibility for any issues that  
475 might arise from the publication of this manuscript.

476

477

## 478 **References**

- 479 1. World Health Organization. Anaemia 2018 [Available from:  
480 [https://www.who.int/health-topics/anaemia#tab=tab\\_1](https://www.who.int/health-topics/anaemia#tab=tab_1).
- 481 2. World Health Organization. WHO. Nutritional anaemias: tools for effective prevention  
482 and control. Nutrition [cited 2020 6.5]. Available from:  
483 [http://www.who.int/nutrition/publications/micronutrients/anaemias-tools-prevention-](http://www.who.int/nutrition/publications/micronutrients/anaemias-tools-prevention-control/en/)  
484 [control/en/](http://www.who.int/nutrition/publications/micronutrients/anaemias-tools-prevention-control/en/).
- 485 3. Chaparro CM, Suchdev PS. Anemia epidemiology, pathophysiology, and etiology in low-  
486 and middle-income countries. *Annals of the New York Academy of Sciences*. 2019;1450(1):15-  
487 31.
- 488 4. Kassebaum NJ. The Global Burden of Anemia. *Hematology/oncology clinics of North*  
489 *America*. 2016;30(2):247-308.
- 490 5. World Health Organization. Global Targets 2025: to improve maternal, infant and young  
491 child nutrition [cited 2020 6.5]. Available from: [https://www.who.int/nutrition/global-target-](https://www.who.int/nutrition/global-target-2025/en/)  
492 [2025/en/](https://www.who.int/nutrition/global-target-2025/en/).
- 493 6. World Health Organization. Nutrition: Global Nutrition Targets 2025: Anaemia policy  
494 brief 2014 [cited 2020 6.5]. Available from:  
495 [https://www.who.int/nutrition/publications/globaltargets2025\\_policybrief\\_anaemia/en/](https://www.who.int/nutrition/publications/globaltargets2025_policybrief_anaemia/en/).
- 496 7. Lopez A, Cacoub P, Macdougall IC, Peyrin-Biroulet L. Iron deficiency anaemia. *Lancet*.  
497 2016;387(10021):907-16.
- 498 8. Young MF. Maternal anaemia and risk of mortality: a call for action. *Lancet Glob Health*.  
499 2018;6(5):e479-e80.
- 500 9. Stevens GA, Finucane MM, De-Regil LM, et al. Global, regional, and national trends in  
501 haemoglobin concentration and prevalence of total and severe anaemia in children and  
502 pregnant and non-pregnant women for 1995-2011: a systematic analysis of population-  
503 representative data. *Lancet Glob Health*. 2013;1(1):e16-25.
- 504 10. United Nations. Sustainable Development Goals 2015 [cited 2020 6.5]. Available from:  
505 <http://www.un.org/sustainabledevelopment/sustainable-development-goals/>.



- 506 11. Ayoya MA, Bendeck MA, Zagré NM, et al. Maternal anaemia in West and Central Africa:  
507 time for urgent action. *Public health nutrition*. 2012;15(5):916-27.
- 508 12. van den Broek N. Anaemia in pregnancy in sub-Saharan countries. *European Journal of*  
509 *Obstetrics and Gynecology and Reproductive Biology*. 2001;96(1):4-6.
- 510 13. Tako EA, Zhou A, Lohoue J, et al. Risk factor for placental malaria and its effect on  
511 pregnancy outcome in Yaounde, Cameroon. *Am J Trop Med Hyg*. 2005;72.
- 512 14. Rahman MM, Abe SK, Rahman MS, et al. Maternal anemia and risk of adverse birth and  
513 health outcomes in low- and middle-income countries: systematic review and meta-analysis.  
514 *Am J Clin Nutr*. 2016;103(2):495-504.
- 515 15. Black RE, Victora CG, Walker SP, et al. Maternal and child undernutrition and overweight  
516 in low-income and middle-income countries. *Lancet*. 2013;382(9890):427-51.
- 517 16. Kavle JA, Stoltzfus RJ, Witter F, et al. Association between anaemia during pregnancy  
518 and blood loss at and after delivery among women with vaginal births in Pemba Island,  
519 Zanzibar, Tanzania. *Journal of health, population, and nutrition*. 2008;26(2):232-40.
- 520 17. Christian P, Mullany LC, Hurley KM, et al. Nutrition and maternal, neonatal, and child  
521 health. *Seminars in perinatology*. 2015;39(5):361-72.
- 522 18. Chowdhury HA, Ahmed KR, Jebunessa F, et al. Factors associated with maternal anaemia  
523 among pregnant women in Dhaka city. *BMC women's health*. 2015;15:77.
- 524 19. Kofie P, Tarkang EE, Manu E, et al. Prevalence and associated risk factors of anaemia  
525 among women attending antenatal and post-natal clinics at a public health facility in Ghana.  
526 *BMC Nutrition*. 2019;5(1):40.
- 527 20. Mockenhaupt FP, Rong B, Günther M, et al. Anaemia in pregnant Ghanaian women:  
528 importance of malaria, iron deficiency, and haemoglobinopathies. *Transactions of the Royal*  
529 *Society of Tropical Medicine and Hygiene*. 2000;94(5):477-83.
- 530 21. Gaillard R, Eilers PH, Yassine S, et al. Risk factors and consequences of maternal anaemia  
531 and elevated haemoglobin levels during pregnancy: a population-based prospective cohort  
532 study. *Paediatric and perinatal epidemiology*. 2014;28(3):213-26.
- 533 22. Hakizimana D, Nisingizwe MP, Logan J, et al. Identifying risk factors of anemia among  
534 women of reproductive age in Rwanda - a cross-sectional study using secondary data from the  
535 Rwanda demographic and health survey 2014/2015. *BMC public health*. 2019;19(1):1662-.
- 536 23. Bentley ME, Griffiths PL. The burden of anemia among women in India. *European*  
537 *journal of clinical nutrition*. 2003;57(1):52-60.
- 538 24. Gobezi M, Mekonnen Z, Alem M, et al. Prevalence and Predictors of Maternal Anemia  
539 during Pregnancy in Gondar, Northwest Ethiopia: An Institutional Based Cross-Sectional Study.  
540 *Anemia*. 2014;2014:108593.
- 541 25. Harding KL, Aguayo VM, Namirembe G, et al. Determinants of anemia among women  
542 and children in Nepal and Pakistan: An analysis of recent national survey data. *Maternal & child*  
543 *nutrition*. 2018;14 Suppl 4(Suppl Suppl 4):e12478.
- 544 26. The DHS Program. Demographic and Health Surveys [Available from:  
545 <http://dhsprogram.com/data/available-datasets.cfm>.
- 546 27. Amugsi DA, Dimbuene ZT, Kimani-Murage EW, et al. Differential effects of dietary  
547 diversity and maternal characteristics on linear growth of children aged 6-59 months in sub-  
548 Saharan Africa: a multi-country analysis. *Public health nutrition*. 2017;20(6):1029-45.

- 549 28. Ghana Statistical Service (GSS), Ghana Health Service (GHS), ICF Macro.  
550 Ghana Demographic and Health Survey 2008 Accra, Ghana: GSS, GHS, and ICF Macro; 2009.
- 551 29. Ministry of Health and Social Services (MoHSS), Macro International Inc. Namibia  
552 Demographic and Health Survey 2006-07 Windhoek, Namibia and Calverton, Maryland, USA:  
553 MoHSS and Macro International Inc. ; 2008.
- 554 30. Ghana Statistical Service (GSS), Ghana Health Service (GHS), ICF International. Ghana  
555 Demographic and Health Survey 2014. Rockville, Maryland, USA: GSS, GHS, and ICF  
556 International.; 2015.
- 557 31. National Population Commission (NPC) [Nigeria], ICF International. Nigeria Demographic  
558 and Health Survey 2013. Abuja, Nigeria, and Rockville, Maryland, USA: NPC and ICF  
559 International. . 2014.
- 560 32. National Bureau of Statistics-Kenya, ICF International. 2014 KDHS Key Findings.  
561 Rockville, Maryland, USA: KNBS and ICF International. 2015.
- 562 33. World Medical Association. Declaration of Helsinki: Ethical Principles for Medical  
563 Research Involving Human Subjects. Bulletin of the World Health Organization. 2001;79(4).
- 564 34. Koenker R, Bassett G. Regression quantiles *Econometrica*. 1978;46(1):33-50.
- 565 35. Amugsi DA, Dimbuene ZT, Bakibinga P, et al. Dietary diversity, socioeconomic status and  
566 maternal body mass index (BMI): quantile regression analysis of nationally representative data  
567 from Ghana, Namibia and Sao Tome and Principe. *BMJ Open*. 2016;6(9): doi:10.1136/bmjopen-  
568 2016-012615.
- 569 36. DHS. Anaemia among women and children [cited 2020 22.04]. Available from:  
570 <https://www.dhsprogram.com/pubs/pdf/OD28/12Chapter12.pdf>.
- 571 37. Balarajan YS, Fawzi WW, Subramanian SV. Changing patterns of social inequalities in  
572 anaemia among women in India: cross-sectional study using nationally representative data.  
573 *BMJ Open*. 2013;3(3).
- 574 38. Lakew Y, Biadgilign S, Haile D. Anaemia prevalence and associated factors among  
575 lactating mothers in Ethiopia: evidence from the 2005 and 2011 demographic and health  
576 surveys. *BMJ open*. 2015;5(4):e006001-e.
- 577 39. Friel J, Qasem W, Cai C. Iron and the Breastfed Infant. *Antioxidants (Basel)*. 2018;7(4):54.
- 578 40. Petraro P, Duggan C, Urassa W, et al. Determinants of anemia in postpartum HIV-  
579 negative women in Dar es Salaam, Tanzania. *European journal of clinical nutrition*.  
580 2013;67(7):708-17.
- 581 41. Abioye AI, Aboud S, Premji Z, et al. Iron Supplementation Affects Hematologic  
582 Biomarker Concentrations and Pregnancy Outcomes among Iron-Deficient Tanzanian Women. *J*  
583 *Nutr*. 2016;146(6):1162-71.
- 584 42. Jorgensen JM, Yang Z, Lönnerdal B, et al. Effect of iron supplementation during lactation  
585 on maternal iron status and oxidative stress: A randomized controlled trial. *Maternal & child*  
586 *nutrition*. 2017;13(4).
- 587 43. Abu-Ouf NM, Jan MM. The impact of maternal iron deficiency and iron deficiency  
588 anemia on child's health. *Saudi Med J*. 2015;36(2):146-9.
- 589 44. Ejigu BA, Wencheke E, Berhane K. Spatial pattern and determinants of anaemia in  
590 Ethiopia. *PloS one*. 2018;13(5):e0197171-e.

- 591 45. Gebremedhin S, Enquesslassie F, Umata M. Prevalence and correlates of maternal  
592 anemia in rural Sidama, Southern Ethiopia. *African journal of reproductive health*.  
593 2014;18(1):44-53.
- 594 46. Derso T, Abera Z, Tariku A. Magnitude and associated factors of anemia among pregnant  
595 women in Dera District: a cross-sectional study in northwest Ethiopia. *BMC Res Notes*.  
596 2017;10(1):359.
- 597
- 598
